# Supplementary material
Source: Springer Nature journal article supplement (https://www.springermedizin.de/resource/supplementary/12987_2007_288_MOESM2_ESM.pdf/9611726)

Pressure

compliance

reduced  
compliance

poor-compliance

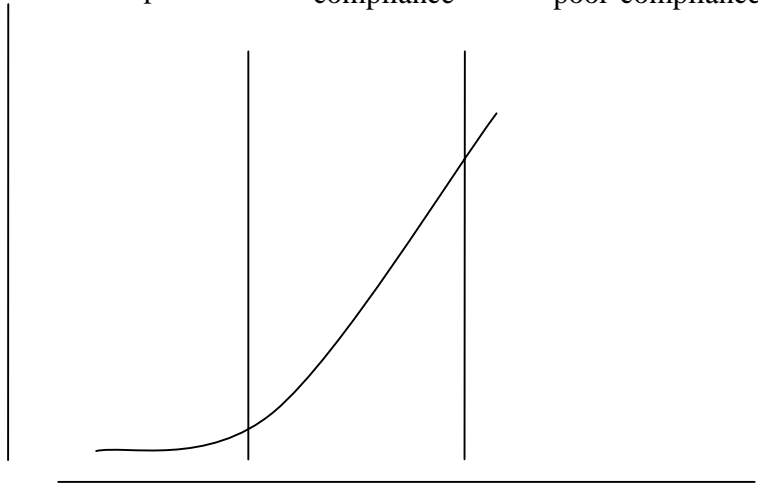

Volume

Supplement: MOESM2 [file 9611726]
